# Supplementary material for: Catchment attributes and meteorology for large sample study in contiguous China
Source: Copernicus journal article supplement (doi:10.5194/essd-2021-71), 2021-04-21
Supplement: Supplementary file 1 [file essd-2021-71-supplement.pdf]

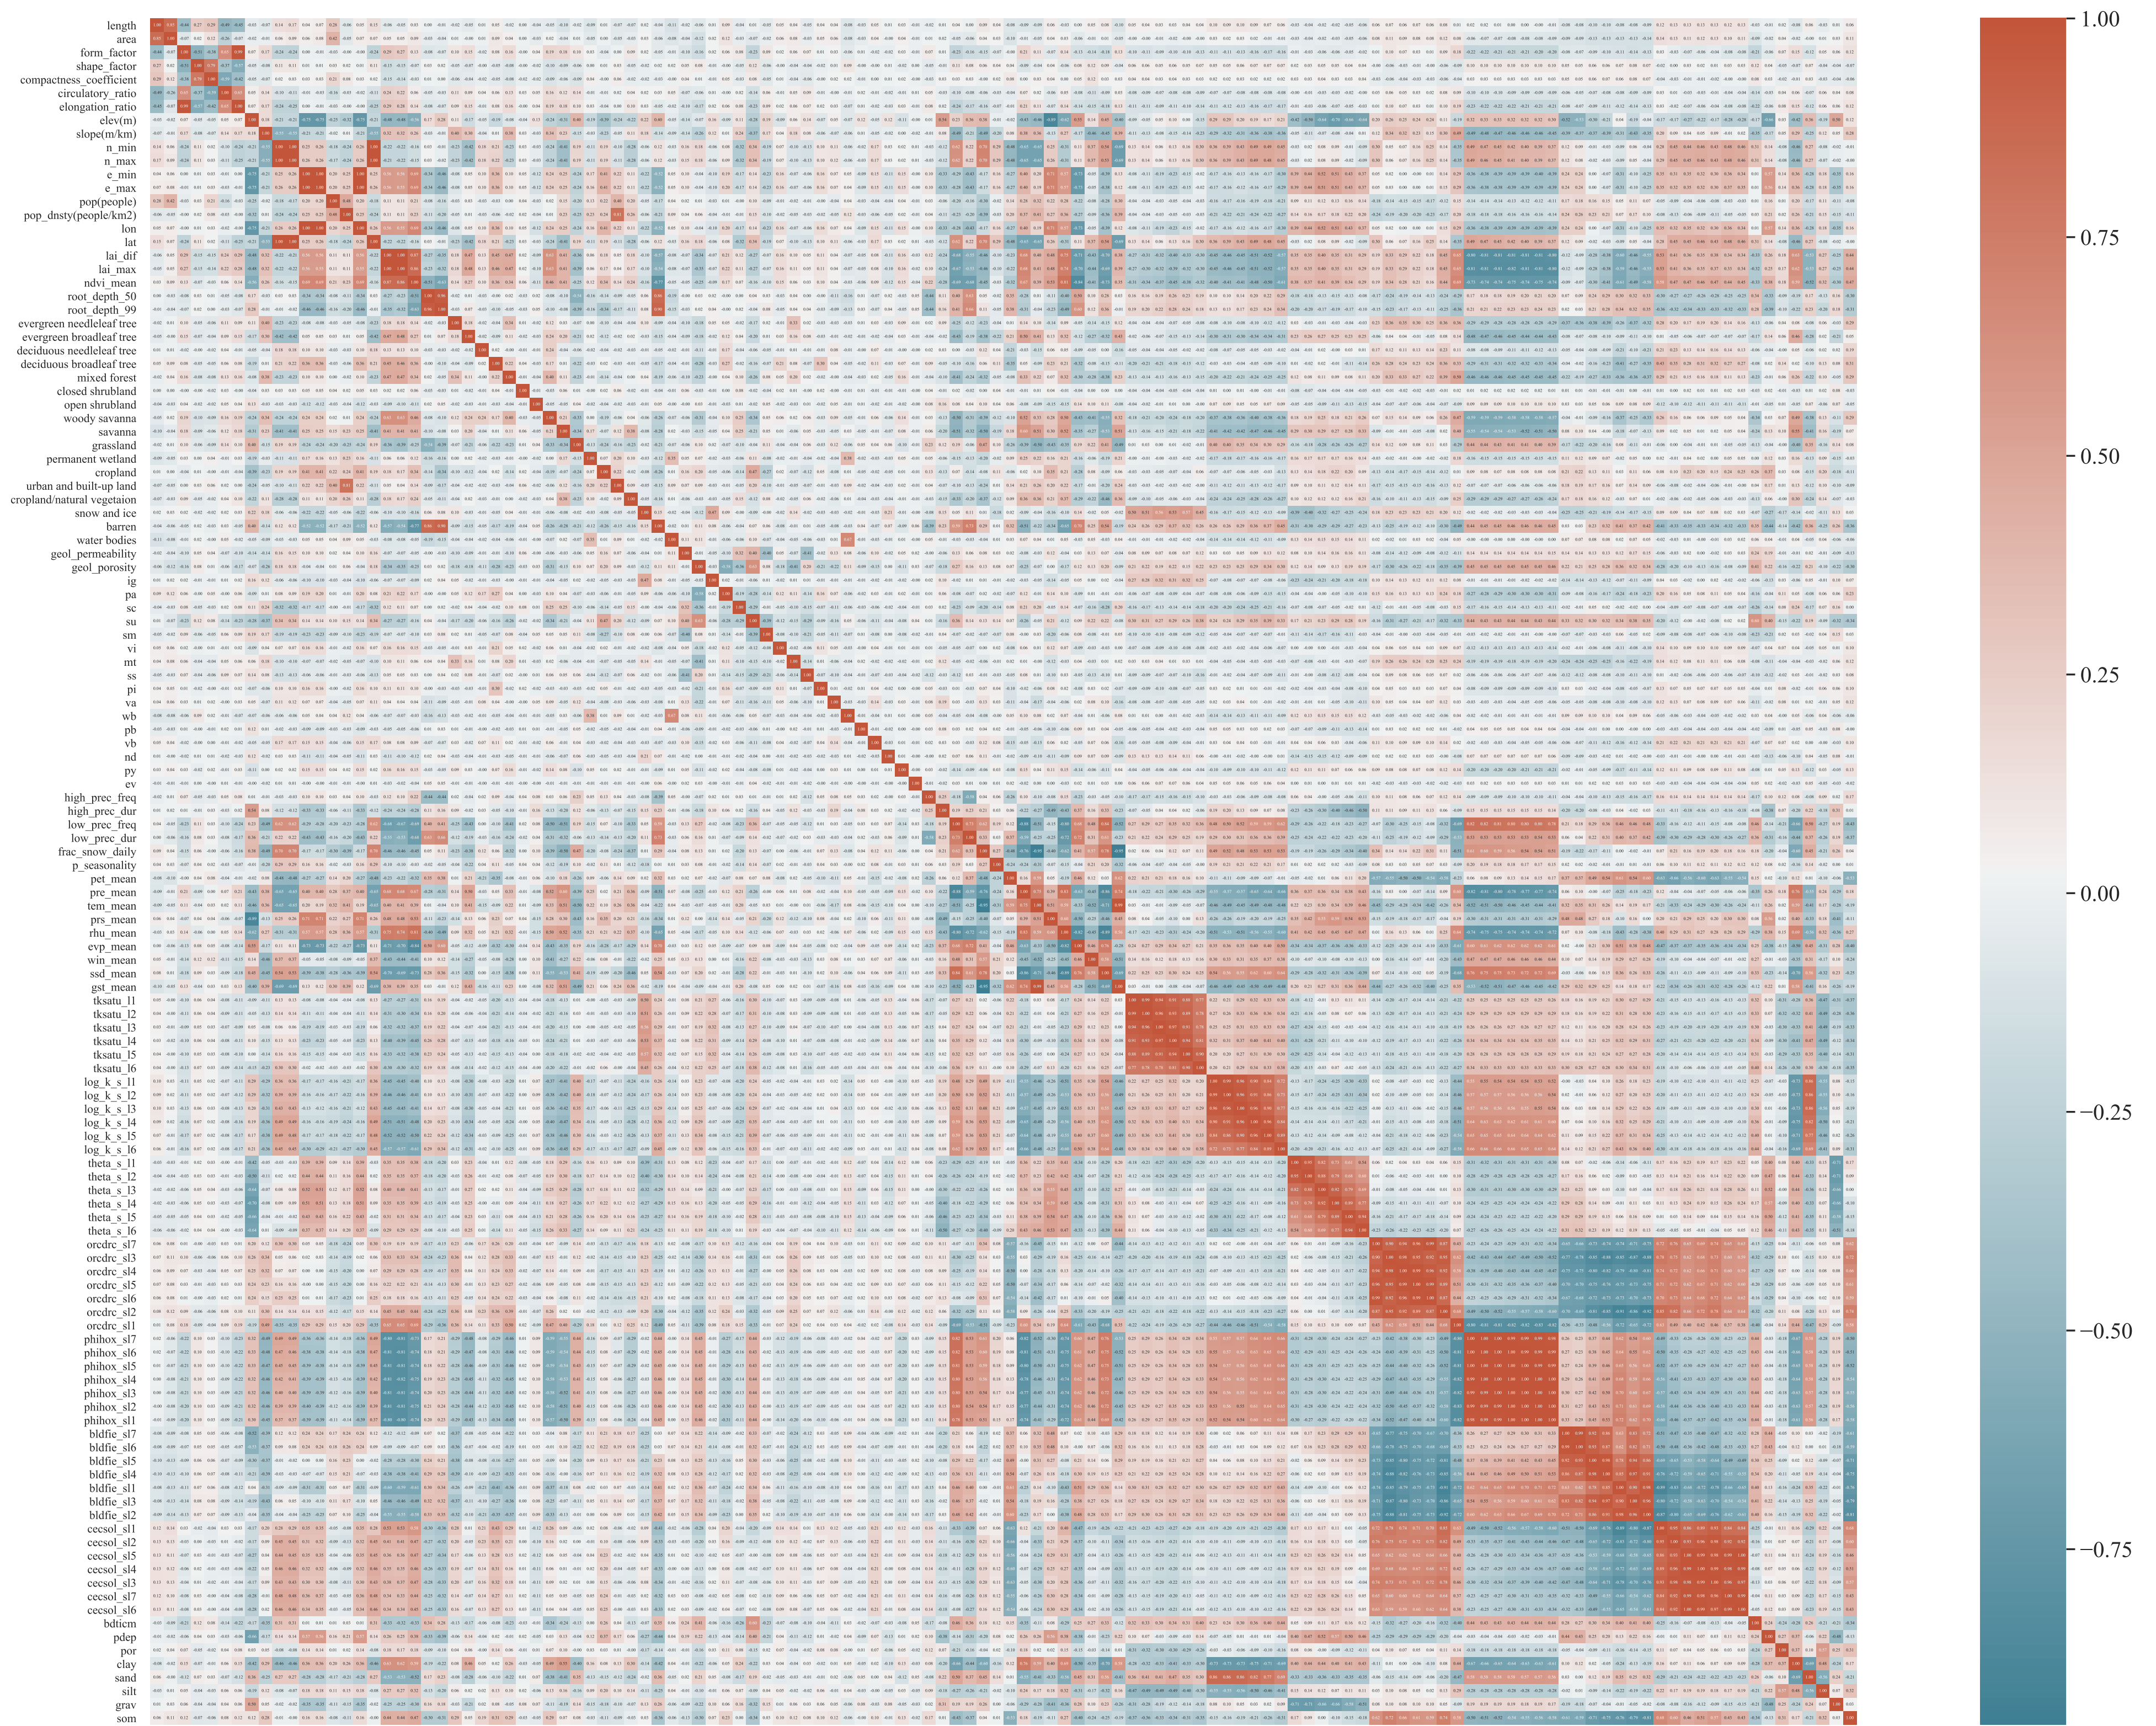

Figure S1. Correlation matrix evaluated by Pearson correlation analysis for all considered attributes. Coefficients are coloured according to their degree of relevance.
